# Supplementary material for: Multifunctional hybrid materials based on transparent poly(methyl methacrylate) reinforced by lanthanoid hydroxo clusters
Source: Royal Society of Chemistry journal article supplement (doi:10.1039/c0dt00947d), 2010-01-01

# Multifunctional Hybrid Materials Based on Transparent Poly(methyl methacrylate) Reinforced by Lanthanoid Hydroxo Clusters

## Electronic Supplementary Information

### Selected bond lengths and angles

Selected bond lengths [ $\text{\AA}$ ] and angles [ $^\circ$ ] for  $[\text{Eu}_5(\text{OH})_5(\text{abzm})_{10}] \cdot 4\text{Toluene}$ .

---

|                           |            |
|---------------------------|------------|
| Eu(1)-O(50)               | 2.3190(18) |
| Eu(1)-O(60)               | 2.3265(18) |
| Eu(1)-O(3)                | 2.3599(17) |
| Eu(1)-O(40)               | 2.3721(18) |
| Eu(1)-O(2)                | 2.3843(17) |
| Eu(1)-O(30)               | 2.4050(19) |
| Eu(1)-O(100) <sup>1</sup> | 2.4832(18) |
| Eu(1)-O(1)                | 2.6487(4)  |
| Eu(2)-O(10)               | 2.3078(18) |
| Eu(2)-O(20)               | 2.3294(19) |
| Eu(2)-O(2)                | 2.3509(17) |
| Eu(2)-O(90)               | 2.3555(19) |
| Eu(2)-O(100)              | 2.3994(17) |
| Eu(2)-O(3) <sup>1</sup>   | 2.3997(18) |
| Eu(2)-O(40)               | 2.4928(18) |
| Eu(2)-O(1)                | 2.5288(4)  |
| Eu(3)-O(70)               | 2.331(8)   |
| Eu(3)-O(80)               | 2.335(8)   |
| Eu(3)-O(110)              | 2.355(6)   |
| Eu(3)-O(120)              | 2.393(5)   |
| Eu(3)-O(3)                | 2.4433(17) |
| Eu(3)-O(2)                | 2.4674(17) |
| O(50)-Eu(1)-O(60)         | 72.75(7)   |
| O(50)-Eu(1)-O(3)          | 76.92(6)   |

|                                 |           |
|---------------------------------|-----------|
| O(60)-Eu(1)-O(3)                | 140.23(7) |
| O(50)-Eu(1)-O(40)               | 152.33(6) |
| O(60)-Eu(1)-O(40)               | 81.55(6)  |
| O(3)-Eu(1)-O(40)                | 130.69(6) |
| O(50)-Eu(1)-O(2)                | 116.58(6) |
| O(60)-Eu(1)-O(2)                | 146.18(7) |
| O(3)-Eu(1)-O(2)                 | 71.46(6)  |
| O(40)-Eu(1)-O(2)                | 79.95(6)  |
| O(50)-Eu(1)-O(30)               | 91.51(6)  |
| O(60)-Eu(1)-O(30)               | 76.12(7)  |
| O(3)-Eu(1)-O(30)                | 130.25(6) |
| O(40)-Eu(1)-O(30)               | 72.15(6)  |
| O(2)-Eu(1)-O(30)                | 71.36(6)  |
| O(50)-Eu(1)-O(100) <sup>1</sup> | 90.62(6)  |
| O(60)-Eu(1)-O(100) <sup>1</sup> | 78.35(6)  |
| O(3)-Eu(1)-O(100) <sup>1</sup>  | 76.85(6)  |
| O(40)-Eu(1)-O(100) <sup>1</sup> | 94.13(6)  |
| O(2)-Eu(1)-O(100) <sup>1</sup>  | 130.95(6) |
| O(30)-Eu(1)-O(100) <sup>1</sup> | 152.47(6) |
| O(50)-Eu(1)-O(1)                | 140.46(5) |
| O(60)-Eu(1)-O(1)                | 128.17(7) |
| O(3)-Eu(1)-O(1)                 | 66.96(6)  |
| O(40)-Eu(1)-O(1)                | 65.10(5)  |
| O(2)-Eu(1)-O(1)                 | 66.97(6)  |
| O(30)-Eu(1)-O(1)                | 123.88(5) |
| O(100) <sup>1</sup> -Eu(1)-O(1) | 66.53(5)  |
| O(10)-Eu(2)-O(20)               | 73.39(7)  |
| O(10)-Eu(2)-O(2)                | 76.07(6)  |
| O(20)-Eu(2)-O(2)                | 137.86(6) |
| O(10)-Eu(2)-O(90)               | 82.51(7)  |
| O(20)-Eu(2)-O(90)               | 78.23(7)  |
| O(2)-Eu(2)-O(90)                | 125.50(6) |
| O(10)-Eu(2)-O(100)              | 147.11(6) |
| O(20)-Eu(2)-O(100)              | 80.43(6)  |

|                                   |            |
|-----------------------------------|------------|
| O(2)-Eu(2)-O(100)                 | 136.24(6)  |
| O(90)-Eu(2)-O(100)                | 72.82(6)   |
| O(10)-Eu(2)-O(3) <sup>1</sup>     | 115.22(7)  |
| O(20)-Eu(2)-O(3) <sup>1</sup>     | 147.09(6)  |
| O(2)-Eu(2)-O(3) <sup>1</sup>      | 73.20(6)   |
| O(90)-Eu(2)-O(3) <sup>1</sup>     | 71.98(6)   |
| O(100)-Eu(2)-O(3) <sup>1</sup>    | 77.74(6)   |
| O(10)-Eu(2)-O(40)                 | 93.97(7)   |
| O(20)-Eu(2)-O(40)                 | 75.74(6)   |
| O(2)-Eu(2)-O(40)                  | 78.17(6)   |
| O(90)-Eu(2)-O(40)                 | 153.63(6)  |
| O(100)-Eu(2)-O(40)                | 98.58(6)   |
| O(3) <sup>1</sup> -Eu(2)-O(40)    | 131.66(6)  |
| O(10)-Eu(2)-O(1)                  | 142.57(5)  |
| O(20)-Eu(2)-O(1)                  | 125.37(7)  |
| O(2)-Eu(2)-O(1)                   | 69.51(6)   |
| O(90)-Eu(2)-O(1)                  | 129.80(5)  |
| O(100)-Eu(2)-O(1)                 | 69.70(5)   |
| O(3) <sup>1</sup> -Eu(2)-O(1)     | 68.43(6)   |
| O(40)-Eu(2)-O(1)                  | 65.35(5)   |
| O(70)-Eu(3)-O(70) <sup>1</sup>    | 118.8(5)   |
| O(70)-Eu(3)-O(80)                 | 73.1(3)    |
| O(70)-Eu(3)-O(80) <sup>1</sup>    | 77.0(3)    |
| O(80)-Eu(3)-O(80) <sup>1</sup>    | 119.2(3)   |
| O(70) <sup>1</sup> -Eu(3)-O(110)  | 116.59(12) |
| O(80)-Eu(3)-O(110)                | 70.2(2)    |
| O(80) <sup>1</sup> -Eu(3)-O(110)  | 77.9(2)    |
| O(110)-Eu(3)-O(110) <sup>1</sup>  | 114.5(3)   |
| O(70)-Eu(3)-O(120) <sup>1</sup>   | 77.5(3)    |
| O(110)-Eu(3)-O(120) <sup>1</sup>  | 74.5(2)    |
| O(70)-Eu(3)-O(120)                | 71.4(3)    |
| O(80)-Eu(3)-O(120)                | 117.63(12) |
| O(110)-Eu(3)-O(120)               | 72.5(2)    |
| O(120) <sup>1</sup> -Eu(3)-O(120) | 116.7(3)   |

|                                |            |
|--------------------------------|------------|
| O(70)-Eu(3)-O(3) <sup>1</sup>  | 133.1(2)   |
| O(80)-Eu(3)-O(3) <sup>1</sup>  | 74.76(19)  |
| O(110)-Eu(3)-O(3) <sup>1</sup> | 131.88(18) |
| O(120)-Eu(3)-O(3) <sup>1</sup> | 155.27(13) |
| O(70)-Eu(3)-O(3)               | 85.4(2)    |
| O(70) <sup>1</sup> -Eu(3)-O(3) | 133.1(2)   |
| O(80)-Eu(3)-O(3)               | 149.57(17) |
| O(80) <sup>1</sup> -Eu(3)-O(3) | 74.76(19)  |
| O(110)-Eu(3)-O(3)              | 88.47(17)  |
| O(120)-Eu(3)-O(3)              | 73.34(14)  |
| O(3) <sup>1</sup> -Eu(3)-O(3)  | 107.38(8)  |
| O(70)-Eu(3)-O(2) <sup>1</sup>  | 152.7(2)   |
| O(80)-Eu(3)-O(2) <sup>1</sup>  | 134.01(19) |
| O(110)-Eu(3)-O(2) <sup>1</sup> | 155.50(17) |
| O(120)-Eu(3)-O(2) <sup>1</sup> | 89.13(13)  |
| O(3)-Eu(3)-O(2) <sup>1</sup>   | 70.45(6)   |
| O(70)-Eu(3)-O(2)               | 73.2(2)    |
| O(80)-Eu(3)-O(2)               | 84.36(17)  |
| O(110)-Eu(3)-O(2)              | 74.21(18)  |
| O(120)-Eu(3)-O(2)              | 129.32(13) |
| O(3)-Eu(3)-O(2)                | 68.69(6)   |
| Eu(2)-O(1)-Eu(2) <sup>1</sup>  | 161.80(11) |
| Eu(2)-O(1)-Eu(1) <sup>1</sup>  | 88.855(18) |
| Eu(2)-O(1)-Eu(1)               | 88.133(18) |
| Eu(1) <sup>1</sup> -O(1)-Eu(1) | 160.87(10) |
| Eu(2)-O(2)-Eu(1)               | 99.04(7)   |
| Eu(2)-O(2)-Eu(3)               | 108.18(6)  |
| Eu(1)-O(2)-Eu(3)               | 108.89(7)  |
| Eu(1)-O(3)-Eu(2) <sup>1</sup>  | 99.22(7)   |
| Eu(1)-O(3)-Eu(3)               | 110.52(7)  |
| Eu(2) <sup>1</sup> -O(3)-Eu(3) | 107.39(6)  |

---

Symmetry transformations used to generate equivalent atoms: <sup>1</sup> -x,y,-z+1/2

Selected bond lengths [Å] and angles [°] for [Tb<sub>5</sub>(OH)<sub>5</sub>(**abzm**)<sub>10</sub>]**·**4Toluene.

---

|                            |           |
|----------------------------|-----------|
| Tb(1)-O(50)                | 2.296(2)  |
| Tb(1)-O(60)                | 2.308(3)  |
| Tb(1)-O(3)                 | 2.344(2)  |
| Tb(1)-O(40)                | 2.346(2)  |
| Tb(1)-O(2)                 | 2.357(2)  |
| Tb(1)-O(30)                | 2.378(3)  |
| Tb(1)-O(100) <sup>1</sup>  | 2.452(2)  |
| Tb(1)-O(1)                 | 2.6212(7) |
| Tb(1)...Tb(2)              | 3.5651(2) |
| Tb(1)...Tb(2) <sup>1</sup> | 3.5787(3) |
| Tb(1)...Tb(3)              | 3.9068(3) |
| Tb(2)-O(10)                | 2.287(3)  |
| Tb(2)-O(20)                | 2.297(3)  |
| Tb(2)-O(2)                 | 2.324(2)  |
| Tb(2)-O(90)                | 2.341(2)  |
| Tb(2)-O(3) <sup>1</sup>    | 2.370(3)  |
| Tb(2)-O(100)               | 2.386(2)  |
| Tb(2)-O(40)                | 2.475(2)  |
| Tb(2)-O(1)                 | 2.5048(7) |
| Tb(2)...Tb(1) <sup>1</sup> | 3.5787(3) |
| Tb(2)...Tb(3)              | 3.8577(3) |
| Tb(3)-O(70)                | 2.261(7)  |
| Tb(3)-O(80)                | 2.331(7)  |
| Tb(3)-O(120)               | 2.358(8)  |
| Tb(3)-O(110)               | 2.379(7)  |
| Tb(3)-O(3)                 | 2.417(2)  |
| Tb(3)-O(2)                 | 2.440(2)  |
| O(50)-Tb(1)-O(60)          | 73.64(9)  |
| O(50)-Tb(1)-O(3)           | 76.26(8)  |
| O(60)-Tb(1)-O(3)           | 140.33(9) |
| O(50)-Tb(1)-O(40)          | 152.74(9) |
| O(60)-Tb(1)-O(40)          | 81.25(9)  |

|                                 |            |
|---------------------------------|------------|
| O(3)-Tb(1)-O(40)                | 130.97(8)  |
| O(50)-Tb(1)-O(2)                | 115.85(9)  |
| O(60)-Tb(1)-O(2)                | 146.16(9)  |
| O(3)-Tb(1)-O(2)                 | 71.40(8)   |
| O(40)-Tb(1)-O(2)                | 80.04(9)   |
| O(50)-Tb(1)-O(30)               | 90.45(9)   |
| O(60)-Tb(1)-O(30)               | 76.02(9)   |
| O(3)-Tb(1)-O(30)                | 129.60(9)  |
| O(40)-Tb(1)-O(30)               | 73.05(9)   |
| O(2)-Tb(1)-O(30)                | 71.66(8)   |
| O(50)-Tb(1)-O(100) <sup>1</sup> | 90.75(9)   |
| O(60)-Tb(1)-O(100) <sup>1</sup> | 77.97(9)   |
| O(3)-Tb(1)-O(100) <sup>1</sup>  | 77.20(9)   |
| O(40)-Tb(1)-O(100) <sup>1</sup> | 94.31(9)   |
| O(2)-Tb(1)-O(100) <sup>1</sup>  | 131.32(8)  |
| O(30)-Tb(1)-O(100) <sup>1</sup> | 152.48(9)  |
| O(50)-Tb(1)-O(1)                | 140.49(7)  |
| O(60)-Tb(1)-O(1)                | 127.55(10) |
| O(3)-Tb(1)-O(1)                 | 67.55(8)   |
| O(40)-Tb(1)-O(1)                | 64.87(8)   |
| O(2)-Tb(1)-O(1)                 | 67.27(8)   |
| O(30)-Tb(1)-O(1)                | 124.71(6)  |
| O(100) <sup>1</sup> -Tb(1)-O(1) | 66.72(7)   |
| O(10)-Tb(2)-O(20)               | 74.06(10)  |
| O(10)-Tb(2)-O(2)                | 75.54(9)   |
| O(20)-Tb(2)-O(2)                | 137.76(8)  |
| O(10)-Tb(2)-O(90)               | 81.71(9)   |
| O(20)-Tb(2)-O(90)               | 78.25(9)   |
| O(2)-Tb(2)-O(90)                | 125.10(9)  |
| O(10)-Tb(2)-O(3) <sup>1</sup>   | 114.48(10) |
| O(20)-Tb(2)-O(3) <sup>1</sup>   | 147.12(8)  |
| O(2)-Tb(2)-O(3) <sup>1</sup>    | 73.25(8)   |
| O(90)-Tb(2)-O(3) <sup>1</sup>   | 72.14(8)   |
| O(10)-Tb(2)-O(100)              | 147.51(9)  |

|                                   |            |
|-----------------------------------|------------|
| O(20)-Tb(2)-O(100)                | 80.30(9)   |
| O(2)-Tb(2)-O(100)                 | 136.35(8)  |
| O(90)-Tb(2)-O(100)                | 73.70(9)   |
| O(3) <sup>1</sup> -Tb(2)-O(100)   | 77.99(9)   |
| O(10)-Tb(2)-O(40)                 | 94.07(9)   |
| O(20)-Tb(2)-O(40)                 | 75.61(9)   |
| O(2)-Tb(2)-O(40)                  | 78.05(8)   |
| O(90)-Tb(2)-O(40)                 | 153.66(9)  |
| O(3) <sup>1</sup> -Tb(2)-O(40)    | 131.89(8)  |
| O(100)-Tb(2)-O(40)                | 98.60(8)   |
| O(10)-Tb(2)-O(1)                  | 142.29(7)  |
| O(20)-Tb(2)-O(1)                  | 124.70(11) |
| O(2)-Tb(2)-O(1)                   | 69.79(9)   |
| O(90)-Tb(2)-O(1)                  | 130.85(7)  |
| O(3) <sup>1</sup> -Tb(2)-O(1)     | 69.18(9)   |
| O(100)-Tb(2)-O(1)                 | 69.60(7)   |
| O(40)-Tb(2)-O(1)                  | 64.96(7)   |
| O(70)-Tb(3)-O(70) <sup>1</sup>    | 126.1(3)   |
| O(70)-Tb(3)-O(80)                 | 76.3(3)    |
| O(70)-Tb(3)-O(80) <sup>1</sup>    | 78.9(3)    |
| O(80)-Tb(3)-O(80) <sup>1</sup>    | 123.5(4)   |
| O(70)-Tb(3)-O(120) <sup>1</sup>   | 77.9(3)    |
| O(70)-Tb(3)-O(120)                | 72.8(3)    |
| O(80)-Tb(3)-O(120)                | 117.63(16) |
| O(120) <sup>1</sup> -Tb(3)-O(120) | 112.1(4)   |
| O(80)-Tb(3)-O(110)                | 71.9(3)    |
| O(120)-Tb(3)-O(110)               | 69.9(3)    |
| O(70)-Tb(3)-O(110) <sup>1</sup>   | 117.88(15) |
| O(80)-Tb(3)-O(110) <sup>1</sup>   | 76.5(3)    |
| O(120)-Tb(3)-O(110) <sup>1</sup>  | 72.6(3)    |
| O(110)-Tb(3)-O(110) <sup>1</sup>  | 109.7(4)   |
| O(70)-Tb(3)-O(3) <sup>1</sup>     | 131.1(2)   |
| O(80)-Tb(3)-O(3) <sup>1</sup>     | 72.1(2)    |
| O(120)-Tb(3)-O(3) <sup>1</sup>    | 155.80(19) |

|                                 |            |
|---------------------------------|------------|
| O(110)-Tb(3)-O(3) <sup>1</sup>  | 133.1(2)   |
| O(70)-Tb(3)-O(3)                | 82.87(19)  |
| O(80)-Tb(3)-O(3)                | 149.96(18) |
| O(120)-Tb(3)-O(3)               | 75.3(2)    |
| O(110)-Tb(3)-O(3)               | 89.7(2)    |
| O(3) <sup>1</sup> -Tb(3)-O(3)   | 107.81(12) |
| O(70)-Tb(3)-O(2) <sup>1</sup>   | 151.6(2)   |
| O(80)-Tb(3)-O(2) <sup>1</sup>   | 132.1(2)   |
| O(120)-Tb(3)-O(2) <sup>1</sup>  | 90.71(18)  |
| O(110)-Tb(3)-O(2) <sup>1</sup>  | 155.6(2)   |
| O(3)-Tb(3)-O(2) <sup>1</sup>    | 70.43(8)   |
| O(70)-Tb(3)-O(2)                | 69.91(19)  |
| O(80)-Tb(3)-O(2)                | 83.70(18)  |
| O(120)-Tb(3)-O(2)               | 130.4(2)   |
| O(110)-Tb(3)-O(2)               | 76.8(2)    |
| O(3)-Tb(3)-O(2)                 | 68.78(8)   |
| O(2) <sup>1</sup> -Tb(3)-O(2)   | 107.47(12) |
| Tb(2)-O(1)-Tb(2) <sup>1</sup>   | 160.52(17) |
| Tb(2)-O(1)-Tb(1) <sup>1</sup>   | 88.53(3)   |
| Tb(2)-O(1)-Tb(1)                | 88.10(3)   |
| Tb(1) <sup>1</sup> -O(1)-Tb(1)  | 159.98(16) |
| Tb(2)-O(2)-Tb(1)                | 99.23(10)  |
| Tb(2)-O(2)-Tb(3)                | 108.15(9)  |
| Tb(1)-O(2)-Tb(3)                | 109.07(9)  |
| Tb(1)-O(3)-Tb(2) <sup>1</sup>   | 98.79(10)  |
| Tb(1)-O(3)-Tb(3)                | 110.29(9)  |
| Tb(2) <sup>1</sup> -O(3)-Tb(3)  | 107.38(9)  |
| Tb(2)-O(100)-Tb(1) <sup>1</sup> | 95.40(9)   |

---

Symmetry transformations used to generate equivalent atoms: <sup>1</sup> -x,y,-z+1/2

Selected bond lengths [Å] and angles [°] for [Ho<sub>5</sub>(OH)<sub>5</sub>(**abzm**)<sub>10</sub>]·4Toluene.

---

|             |          |
|-------------|----------|
| Ho(1)-O(50) | 2.265(2) |
|-------------|----------|



|                           |             |
|---------------------------|-------------|
| Ho(1)-O(60)               | 2.279(2)    |
| Ho(1)-O(3)                | 2.308(2)    |
| Ho(1)-O(40)               | 2.318(2)    |
| Ho(1)-O(2)                | 2.324(2)    |
| Ho(1)-O(30)               | 2.362(2)    |
| Ho(1)-O(100) <sup>1</sup> | 2.430(2)    |
| Ho(1)-O(1)                | 2.5779(5)   |
| Ho(1)..Ho(2)              | 3.51086(19) |
| Ho(1)..Ho(2) <sup>1</sup> | 3.53528(18) |
| Ho(1)..Ho(3)              | 3.85716(19) |
| Ho(2)-O(10)               | 2.263(2)    |
| Ho(2)-O(20)               | 2.279(2)    |
| Ho(2)-O(2)                | 2.297(2)    |
| Ho(2)-O(90)               | 2.313(2)    |
| Ho(2)-O(3) <sup>1</sup>   | 2.339(2)    |
| Ho(2)-O(100)              | 2.347(2)    |
| Ho(2)-O(40)               | 2.436(2)    |
| Ho(2)-O(1)                | 2.4760(5)   |
| Ho(2)...Ho(3)             | 3.8198(2)   |
| Ho(3)-O(70)               | 2.275(7)    |
| Ho(3)-O(80)               | 2.302(6)    |
| Ho(3)-O(110)              | 2.323(8)    |
| Ho(3)-O(120)              | 2.334(7)    |
| Ho(3)-O(3)                | 2.384(2)    |
| Ho(3)-O(2)                | 2.416(2)    |
| O(50)-Ho(1)-O(60)         | 74.41(8)    |
| O(50)-Ho(1)-O(3)          | 75.98(7)    |
| O(60)-Ho(1)-O(3)          | 140.25(8)   |
| O(50)-Ho(1)-O(40)         | 152.97(8)   |
| O(60)-Ho(1)-O(40)         | 81.24(8)    |
| O(3)-Ho(1)-O(40)          | 131.05(7)   |
| O(50)-Ho(1)-O(2)          | 114.50(8)   |
| O(60)-Ho(1)-O(2)          | 146.13(8)   |

|                                 |           |
|---------------------------------|-----------|
| O(3)-Ho(1)-O(2)                 | 71.46(7)  |
| O(40)-Ho(1)-O(2)                | 80.12(8)  |
| O(50)-Ho(1)-O(30)               | 89.05(8)  |
| O(60)-Ho(1)-O(30)               | 76.10(8)  |
| O(3)-Ho(1)-O(30)                | 129.22(8) |
| O(40)-Ho(1)-O(30)               | 73.65(8)  |
| O(2)-Ho(1)-O(30)                | 71.64(7)  |
| O(50)-Ho(1)-O(100) <sup>1</sup> | 91.82(8)  |
| O(60)-Ho(1)-O(100) <sup>1</sup> | 77.95(8)  |
| O(3)-Ho(1)-O(100) <sup>1</sup>  | 77.10(7)  |
| O(40)-Ho(1)-O(100) <sup>1</sup> | 94.45(7)  |
| O(2)-Ho(1)-O(100) <sup>1</sup>  | 131.46(7) |
| O(30)-Ho(1)-O(100) <sup>1</sup> | 152.78(8) |
| O(50)-Ho(1)-O(1)                | 140.38(6) |
| O(60)-Ho(1)-O(1)                | 127.61(9) |
| O(3)-Ho(1)-O(1)                 | 67.27(7)  |
| O(40)-Ho(1)-O(1)                | 65.27(6)  |
| O(2)-Ho(1)-O(1)                 | 67.57(7)  |
| O(30)-Ho(1)-O(1)                | 125.56(6) |
| O(100) <sup>1</sup> -Ho(1)-O(1) | 66.53(6)  |
| O(10)-Ho(2)-O(20)               | 75.11(8)  |
| O(10)-Ho(2)-O(2)                | 74.98(8)  |
| O(20)-Ho(2)-O(2)                | 138.07(7) |
| O(10)-Ho(2)-O(90)               | 81.26(9)  |
| O(20)-Ho(2)-O(90)               | 78.27(8)  |
| O(2)-Ho(2)-O(90)                | 124.72(8) |
| O(10)-Ho(2)-O(3) <sup>1</sup>   | 114.02(8) |
| O(20)-Ho(2)-O(3) <sup>1</sup>   | 147.30(7) |
| O(2)-Ho(2)-O(3) <sup>1</sup>    | 72.96(7)  |
| O(90)-Ho(2)-O(3) <sup>1</sup>   | 72.65(8)  |
| O(10)-Ho(2)-O(100)              | 148.10(8) |
| O(20)-Ho(2)-O(100)              | 79.93(7)  |
| O(2)-Ho(2)-O(100)               | 136.28(7) |
| O(90)-Ho(2)-O(100)              | 74.41(8)  |

|                                   |            |
|-----------------------------------|------------|
| O(3) <sup>1</sup> -Ho(2)-O(100)   | 78.16(7)   |
| O(10)-Ho(2)-O(40)                 | 94.31(8)   |
| O(20)-Ho(2)-O(40)                 | 75.43(8)   |
| O(2)-Ho(2)-O(40)                  | 78.23(7)   |
| O(90)-Ho(2)-O(40)                 | 153.58(8)  |
| O(3)#1-Ho(2)-O(40)                | 131.64(7)  |
| O(100)-Ho(2)-O(40)                | 98.35(7)   |
| O(10)-Ho(2)-O(1)                  | 142.00(7)  |
| O(20)-Ho(2)-O(1)                  | 124.61(9)  |
| O(2)-Ho(2)-O(1)                   | 69.77(7)   |
| O(90)-Ho(2)-O(1)                  | 131.08(6)  |
| O(3) <sup>1</sup> -Ho(2)-O(1)     | 68.61(7)   |
| O(100)-Ho(2)-O(1)                 | 69.44(6)   |
| O(40)-Ho(2)-O(1)                  | 65.28(6)   |
| O(70)-Ho(3)-O(70) <sup>1</sup>    | 119.3(4)   |
| O(70)-Ho(3)-O(80)                 | 75.0(3)    |
| O(70) <sup>1</sup> -Ho(3)-O(80)   | 77.7(3)    |
| O(80) <sup>1</sup> -Ho(3)-O(80)   | 124.3(3)   |
| O(70) <sup>1</sup> -Ho(3)-O(110)  | 116.98(12) |
| O(80) <sup>1</sup> -Ho(3)-O(110)  | 79.1(3)    |
| O(80)-Ho(3)-O(110)                | 71.7(3)    |
| O(110)-Ho(3)-O(110) <sup>1</sup>  | 114.7(5)   |
| O(110)-Ho(3)-O(120) <sup>1</sup>  | 72.6(3)    |
| O(70)-Ho(3)-O(120)                | 71.2(2)    |
| O(70) <sup>1</sup> -Ho(3)-O(120)  | 76.0(3)    |
| O(80)-Ho(3)-O(120)                | 117.92(14) |
| O(110)-Ho(3)-O(120)               | 72.3(3)    |
| O(120) <sup>1</sup> -Ho(3)-O(120) | 111.9(3)   |
| O(70)-Ho(3)-O(3)                  | 85.4(2)    |
| O(80)-Ho(3)-O(3)                  | 149.14(14) |
| O(110)-Ho(3)-O(3)                 | 88.8(2)    |
| O(120)-Ho(3)-O(3)                 | 76.06(17)  |
| O(70)-Ho(3)-O(3) <sup>1</sup>     | 133.1(2)   |
| O(80)-Ho(3)-O(3) <sup>1</sup>     | 72.43(16)  |

|                                 |            |
|---------------------------------|------------|
| O(110)-Ho(3)-O(3) <sup>1</sup>  | 131.6(2)   |
| O(120)-Ho(3)-O(3) <sup>1</sup>  | 155.32(15) |
| O(3)-Ho(3)-O(3) <sup>1</sup>    | 106.83(10) |
| O(70)-Ho(3)-O(2)1               | 152.4(2)   |
| O(80)-Ho(3)-O(2)1               | 132.56(16) |
| O(120)-Ho(3)-O(2)1              | 90.35(13)  |
| O(3)-Ho(3)-O(2) <sup>1</sup>    | 70.10(7)   |
| O(70)-Ho(3)-O(2)                | 73.2(2)    |
| O(80)-Ho(3)-O(2)                | 82.88(13)  |
| O(110)-Ho(3)-O(2)               | 74.2(2)    |
| O(110) <sup>1</sup> -Ho(3)-O(2) | 155.6(2)   |
| O(120)-Ho(3)-O(2)               | 131.05(17) |
| O(3)-Ho(3)-O(2)                 | 68.61(7)   |
| O(2) <sup>1</sup> -Ho(3)-O(2)   | 107.47(10) |
| Ho(2) <sup>1</sup> -O(1)-Ho(2)  | 160.93(13) |
| Ho(2)-O(1)-Ho(1)                | 87.98(2)   |
| Ho(2)-O(1)-Ho(1) <sup>1</sup>   | 88.75(2)   |
| Ho(1)-O(1)-Ho(1) <sup>1</sup>   | 160.16(12) |
| Ho(2)-O(2)-Ho(1)                | 98.88(8)   |
| Ho(2)-O(2)-Ho(3)                | 108.25(7)  |
| Ho(1)-O(2)-Ho(3)                | 108.91(8)  |
| Ho(1)-O(3)-Ho(2) <sup>1</sup>   | 99.06(8)   |
| Ho(1)-O(3)-Ho(3)                | 110.58(8)  |
| Ho(2) <sup>1</sup> -O(3)-Ho(3)  | 107.97(7)  |

---

Symmetry transformations used to generate equivalent atoms: <sup>1</sup> -x,y,-z+1/2

## Raman spectrum of the abzmH ligand

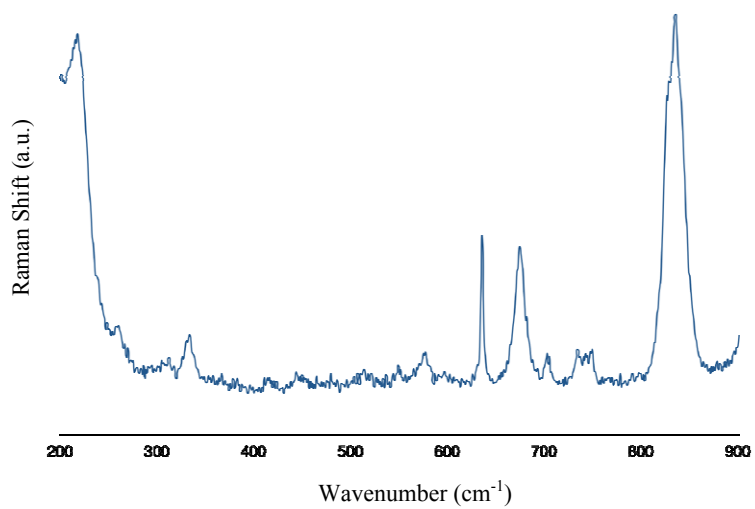

Supplement: c0dt00947d.pdf [file c0dt00947d.pdf]
